# Supplementary material for: The Benefits of Colorectal Surgery Surveys in Australia and New Zealand
Source: PubMed Central journal article supplement — Ann Coloproctol. 2020 Apr 30;36(2):102–11. doi: 10.3393/ac.2019.09.17 (PMC7299568; doi:10.3393/ac.2019.09.17), 2020-04-30
Supplement: ac-2019-09-17-suppl1.pdf [file ac-2019-09-17-suppl1.pdf]

**Supplementary Table 1.** List of survey topics general categories for CSSANZ surveys 2009–2017 (n=38)

| No. (%) | Survey topic                                                      |
|---------|-------------------------------------------------------------------|
| 6 (16)  | Rectal Cancer Decision-Making                                     |
| 5 (13)  | Pre-operative Assessment of Colorectal Patients                   |
| 4 (11)  | Anal Physiology: Continence and Defaecation                       |
| 2 (5)   | Surgical Management of Colon Cancer                               |
| 2 (5)   | Anastomotic Complications                                         |
| 2 (5)   | IBD Diagnosis and Evaluation                                      |
| 2 (5)   | Rectal Cancer: Neoadjuvant Therapy                                |
| 2 (5)   | Diverticular Disease                                              |
| 1 (3)   | Colorectal Cancer: Post-operative Adjuvant Therapy                |
| 1 (3)   | Post-operative Complications                                      |
| 1 (3)   | Trauma of colon, Rectum ad Anus                                   |
| 1 (3)   | Endoscopy                                                         |
| 1 (3)   | Large Bowel Obstruction                                           |
| 1 (3)   | Colon Cancer: Preop Evaluation and Staging                        |
| 1 (3)   | Proctectomy                                                       |
| 1 (3)   | Pilonidal Disease                                                 |
| 1 (3)   | Approach to Anal Pain                                             |
| 1 (3)   | Colorectal Neoplasm: Screening and surveillance after polypectomy |
| 1 (3)   | Molecular basis of CRC and inherited CRC Syndromes                |
| 1 (3)   | Haemorrhoids                                                      |
| 1 (3)   | Endoscopic Management of Polyps and Polypectomy                   |

CSSANZ, Colorectal Society Australia & New Zealand.

Categories taken from chapter list of *ASCRS Textbook of Colon and Rectal Surgery* [1].
