# Supplementary material for: The Benefits of Colorectal Surgery Surveys in Australia and New Zealand
Source: PubMed Central journal article supplement — Ann Coloproctol. 2020 Apr 30;36(2):102–11. doi: 10.3393/ac.2019.09.17 (PMC7299568; doi:10.3393/ac.2019.09.17), 2020-04-30
Supplement: ac-2019-09-17-suppl3.pdf [file ac-2019-09-17-suppl3.pdf]

**Supplementary Table 3.** Summary list of CSSANZ surveys from 2009 to 2017 that were published

| Survey year | Author (publication year)        | Group 1 (% of total NumR)          | NumR (SS)              | % RR | Group 2 (% of total NumR)                                                | NumR (SS)  | % RR | Group 3 (% of total NumR) | NumR (SS) | % RR | Total NumR (total SS) | Total % RR |
|-------------|----------------------------------|------------------------------------|------------------------|------|--------------------------------------------------------------------------|------------|------|---------------------------|-----------|------|-----------------------|------------|
| 2009        | Spigelman et al. [2] (2013)      | CSSANZ CRS (-)                     | 12 (66 <sup>a</sup> )  | 18.2 | General surgeons [RACS] (-)                                              | 15 (-)     | -    | Other surgeons (-)        | 6 (-)     | -    | 33 (49)               | 67.4       |
|             | Jorgensen et al. [3] (2011)      | CSSANZ CRS (100)                   | 102 (146)              | 69.9 | -                                                                        | -          | -    | -                         | -         | -    | 102 (146)             | 69.9       |
|             | MacDermid et al. [4] (2014)      | CSSANZ CRS (100)                   | 110 (146)              | 75.3 | -                                                                        | -          | -    | -                         | -         | -    | 110 (146)             | 75.3       |
| 2010        | Kahokehr et al. [5] (2011)       | CSSANZ CRS (100)                   | 82 (152)               | 54.0 | -                                                                        | -          | -    | -                         | -         | -    | 82 (152)              | 54.0       |
|             | Leong et al. [6] (2015)          | CSSANZ CRS (17)                    | 46 (128)               | 35.9 | Physician gastroenterologists (83)                                       | 218 (411)  | 53.0 | -                         | -         | -    | 264 (539)             | 49.0       |
|             | Ooi et al. [7] (2012)            | CSSANZ CRS (100)                   | 108 (174)              | 62.1 | -                                                                        | -          | -    | -                         | -         | -    | 108 (174)             | 62.1       |
|             | Suen et al. [8] (2015)           | CSSANZ CRS (100)                   | 96 (148)               | 64.9 | -                                                                        | -          | -    | -                         | -         | -    | 96 (148)              | 64.9       |
|             | Warrier et al. [9] (2013)        | CSSANZ CRS consultants (87)        | 99 (-)                 | -    | CSSANZ training fellows (13)                                             | 15 (-)     | -    | -                         | -         | -    | 114 (189)             | 60.3       |
| 2011        | Behrenbruch et al. [10] (2015)   | CSSANZ CRS (100)                   | 66 (154)               | 42.9 | -                                                                        | -          | -    | -                         | -         | -    | 66 (154)              | 42.9       |
|             | Hong et al. [11] (2014)          | CSSANZ CRS (100)                   | 107 (152)              | 70.4 | -                                                                        | -          | -    | -                         | -         | -    | 107 (152)             | 70.4       |
| 2012        | Smart et al. [12] (2013)         | CSSANZ CRS (100)                   | 128 (204)              | 62.8 | -                                                                        | -          | -    | -                         | -         | -    | 128 (204)             | 62.8       |
|             | Holt et al. [13] (2017)          | Crohn's and Colitis Australia (87) | 928 (3,867)            | 24.0 | "Clinicians" (13): 46 gastroenterologists; 12 CSSANZ CRS, 73 dieticians. | 136 (-)    | ND   | -                         | -         | -    | 1,064 (-)             | ND         |
|             | Al-Mozany et al. [14] (2017)     | CSSANZ CRS (100)                   | 113 (165)              | 68.5 | -                                                                        | -          | -    | -                         | -         | -    | 113 (165)             | 68.5       |
| 2013        | Ansari et al. [15] (2015)        | CSSANZ CRS (100)                   | 106 (165)              | 64.2 | -                                                                        | -          | -    | -                         | -         | -    | 106 (165)             | 64.2       |
| 2014        | Burnett et al. [16] (2018)       | CSSANZ CRS (51)                    | 111 (190)              | 58.4 | GSA (49)                                                                 | 105 (592)  | 17.7 | -                         | -         | -    | 216 (782)             | 27.6       |
| 2015        | Jaung et al. [17] (2016)         | CSSANZ CRS (84)                    | 99 (200)               | 49.5 | General surgeons in Auckland (16)                                        | 19 (36)    | 52.8 | -                         | -         | -    | 118 (236)             | 50.0       |
|             | Chen et al. [18] (2017)          | CSSANZ CRS (40)                    | 73 (160 <sup>b</sup> ) | 45.6 | Genetics professionals (33)                                              | 59 (-)     | -    | Gastroenterologists (27)  | 49 (-)    | -    | 181 (-)               | -          |
|             | Zahid et al. [19] (2017)         | CSSANZ CRS (100)                   | 126 (202)              | 62.4 | -                                                                        | -          | -    | -                         | -         | -    | 126 (202)             | 62.4       |
| 2016        | Siddiqui et al. [20] (2017)      | CSSANZ CRS (100)                   | 102 (205)              | 49.8 | -                                                                        | -          | -    | -                         | -         | -    | 102 (205)             | 49.8       |
| 2017        | Chittiborough et al. [21] (2018) | CSSANZ CRS (68)                    | 52 (188)               | 27.7 | Australian GESA endoscopists (32)                                        | 20 (1,912) | 1.1  | -                         | -         | -    | 72 (2,100)            | 3.4        |

CSSANZ, Colorectal Surgery Society Australia and New Zealand; PI, principal investigator; NumR, number of respondents; SS, surveys sent; CRS, colorectal surgeons; RR, response rate; UNSW, University of New South Wales; RACS, Royal Australasian College of Surgeons; GESA, Gastroenterological Society of Australia; GSA, General Surgeons Australia; ND, Not defined. <sup>a</sup>Number confirmed by CSSANZ Secretariat.
